# Supplementary material for: Untargeted Metabolomics-Based Screening Method for Inborn Errors of Metabolism using Semi-Automatic Sample Preparation with an UHPLC- Orbitrap-MS Platform
Source: MDPI journal article supplement (doi:10.3390/metabo9120289), 2019-11-26
Supplement: s1 [file s1]

Table S1: Within batch variation in retention time

| Monitored compounds ESI (+)             | Median CV (%) | Range in CV (%) |
|-----------------------------------------|---------------|-----------------|
| 3,3 – dimethylglutaric acid             | 0.08          | 0.08 - 0.26     |
| 5 - bromotryptophan                     | 0.09          | 0.08 - 0.25     |
| D <sub>2</sub> - acetylcarnitine        | 0.30          | 0.22 - 1.12     |
| D <sub>3</sub> - carnitine              | 0.39          | 0.21 - 0.79     |
| D <sub>3</sub> - hexadecanoylcarnitine  | 0.04          | 0.04 - 0.05     |
| D <sub>3</sub> - hexanoylcarnitine      | 0.08          | 0.07 - 0.24     |
| D <sub>10</sub> - isoleucine            | 0.24          | 0.21 - 0.78     |
| D <sub>6</sub> - ornithine              | 0.47          | 0.10 - 0.83     |
| D <sub>5</sub> - phenylalanine          | 0.11          | 0.08 - 0.37     |
| D <sub>3</sub> - tetradecanoylcarnitine | 0.04          | 0.04 - 0.05     |
| D <sub>4</sub> - tyrosine               | 0.24          | 0.16 - 0.74     |
| 1,3 - <sup>15</sup> N - uracil          | 0.31          | 0.29 - 0.78     |
| D <sub>2</sub> - uridine                | 0.26          | 0.22 - 0.79     |
| D <sub>8</sub> - valine                 | 0.54          | 0.52 - 1.12     |

| Monitored compounds ESI (-)                 | Median CV (%) | Range in CV (%) |
|---------------------------------------------|---------------|-----------------|
| 3,3 – dimethylglutaric acid                 | 0.08          | 0.06 - 0.21     |
| 5 - bromotryptophan                         | 0.08          | 0.07 - 0.21     |
| D <sub>4</sub> – glycochenodeoxycholic acid | 0.04          | 0.04 - 0.12     |
| D <sub>10</sub> - isoleucine                | 0.25          | 0.23 - 0.37     |
| D <sub>3</sub> – methylmalonic acid         | 0.29          | 0.23 - 0.35     |
| D <sub>5</sub> - phenylalanine              | 0.11          | 0.10 - 0.22     |
| <sup>13</sup> C - thymidine                 | 0.11          | 0.08 - 0.28     |
| D <sub>4</sub> - tyrosine                   | 0.22          | 0.14 - 0.28     |
| 1,3- <sup>15</sup> N - uracil               | 0.33          | 0.30 - 0.37     |
| D <sub>2</sub> - uridine                    | 0.22          | 0.20 - 0.32     |

Table S2: Between batch variation in retention time

| Monitored standard                          | Ion mode | Median RT (min) | CV (%) | CV (%) column 1 <sup>a</sup> | CV (%) column 2 <sup>b</sup> |
|---------------------------------------------|----------|-----------------|--------|------------------------------|------------------------------|
| D <sub>6</sub> - ornithine                  | +        | 0.74            | 0.55   | 0.65                         | 0.17                         |
| D <sub>3</sub> - carnitine                  | +        | 0.91            | 0.48   | 0.73                         | 0.08                         |
| D <sub>8</sub> - valine                     | +/-      | 1.09            | 1.45   | 0.74                         | 0.53                         |
| 1,3- <sup>15</sup> N - uracil               | +/-      | 1.32            | 1.55   | 0.43                         | 0.73                         |
| D <sub>10</sub> - isoleucine                | +/-      | 1.82            | 3.84   | 0.74                         | 1.17                         |
| D <sub>2</sub> - uridine                    | +/-      | 1.96            | 4.68   | 0.70                         | 1.70                         |
| D <sub>3</sub> – methylmalonic acid         | -        | 2.07            | 5.32   | 0.86                         | 2.00                         |
| D <sub>2</sub> - acetylcarnitine            | +        | 2.31            | 1.65   | 1.36                         | 0.86                         |
| D <sub>4</sub> - tyrosine                   | +/-      | 2.72            | 5.35   | 1.01                         | 1.93                         |
| D <sub>5</sub> - phenylalanine              | +/-      | 3.61            | 1.49   | 0.29                         | 0.76                         |
| <sup>13</sup> C - thymidine                 | +/-      | 3.65            | 0.97   | 0.22                         | 0.24                         |
| 3,3 - dimethylglutaric acid                 | +/-      | 4.40            | 0.80   | 0.29                         | 0.76                         |
| D <sub>3</sub> - hexanoylcarnitine          | +        | 5.04            | 0.19   | 0.18                         | 0.22                         |
| 5 - bromotryptophan                         | +/-      | 5.10            | 0.22   | 0.22                         | 0.16                         |
| D <sub>4</sub> - glycochenodeoxycholic acid | -        | 8.19            | 0.14   | 0.07                         | 0.10                         |
| D <sub>3</sub> - tetradecanoylcarnitine     | +        | 8.99            | 0.34   | 0.28                         | 0.21                         |
| D <sub>3</sub> - hexadecanoylcarnitine      | +        | 9.34            | 0.46   | 0.39                         | 0.21                         |

a: CV based on 3 batches, which consist out of 169 injections per ion mode

b: CV based on 5 batches, which consist out of 395 injections per ion mode

Table S3: Within batch variation in peak area

Positive ion mode

| <b>ISTD</b>                    | <b>Median CV (%)</b> | <b>Range CV (%)</b> |
|--------------------------------|----------------------|---------------------|
| D <sub>5</sub> - phenylalanine | 13.0                 | 9.8 - 19.1          |
| 3,3 – dimethylglutaric acid    | 12.8                 | 8.8 - 15.8          |
| 1,3- <sup>15</sup> N - uracil  | 13.8                 | 9.6 - 17.4          |
| D <sub>10</sub> - isoleucine   | 13.3                 | 10.2 - 16.7         |
| D <sub>3</sub> - carnitine     | 13.3                 | 9.1 - 17.4          |
| D <sub>6</sub> - ornithine     | 16.3                 | 10.7 - 19.3         |
| 5 - bromotryptophan            | 16.3                 | 12.1 - 21.1         |
| D <sub>4</sub> - tyrosine      | 14.3                 | 10.3 - 17.6         |

| <b>ESTD</b>                             | <b>Median CV (%)</b> | <b>Range CV (%)</b> |
|-----------------------------------------|----------------------|---------------------|
| D <sub>8</sub> - valine                 | 7.2                  | 4.3 - 14.9          |
| D <sub>2</sub> - uridine                | 6.7                  | 5.0 - 11.2          |
| D <sub>2</sub> - acetylcarnitine        | 8.0                  | 6.4 - 14.5          |
| D <sub>3</sub> - hexanoylcarnitine      | 6.4                  | 4.5 - 10.1          |
| D <sub>3</sub> - tetradecanoylcarnitine | 19.0                 | 13.1 - 30.3         |
| D <sub>3</sub> - hexadecanoylcarnitine  | 19.4                 | 15.3 - 28           |

Negative ion mode

| <b>ISTD</b>                                 | <b>Median CV (%)</b> | <b>Range CV (%)</b> |
|---------------------------------------------|----------------------|---------------------|
| D <sub>5</sub> - phenylalanine              | 14.8                 | 11 - 17.4           |
| <sup>13</sup> C - thymidine                 | 12.4                 | 9.2 - 16.6          |
| 3,3 – dimethylglutaric acid                 | 10.8                 | 8.2 - 15.2          |
| 5 - bromotryptophane                        | 14.9                 | 11.6 - 19.7         |
| D <sub>4</sub> - tyrosine_D4                | 16.2                 | 11.2 - 18.9         |
| D <sub>4</sub> – glycochenodeoxycholic acid | 18.4                 | 14.3 - 19.3         |

| <b>ESTD</b>                         | <b>Median CV (%)</b> | <b>Range CV (%)</b> |
|-------------------------------------|----------------------|---------------------|
| D <sub>3</sub> – methylmalonic acid | 13.7                 | 6.4 - 18.8          |
| D <sub>2</sub> - uridine            | 9.3                  | 7.5 - 11.9          |

Table S4: Between batch variation in peak area

Positive ion mode

| <b>ISTD</b>                    | <b>CV (%)</b> |
|--------------------------------|---------------|
| 1,3 - <sup>15</sup> N - uracil | 19            |
| 5 - bromotryptophan            | 22            |
| D <sub>3</sub> - carnitine     | 23            |
| D <sub>6</sub> - ornithine     | 25            |
| D <sub>4</sub> - tyrosine      | 27            |
| D <sub>10</sub> - isoleucine   | 28            |
| D <sub>5</sub> - phenylalanine | 29            |
| 3,3 - dimethylglutaric acid    | 68            |

| <b>ESTD</b>                             | <b>CV (%)</b> |
|-----------------------------------------|---------------|
| D <sub>2</sub> - acetylcarnitine        | 31            |
| D <sub>3</sub> - hexanoylcarnitine      | 29            |
| D <sub>3</sub> - tetradecanoylcarnitine | 26            |
| D <sub>3</sub> - hexadecanoylcarnitine  | 32            |
| D <sub>8</sub> - valine                 | 41            |
| D <sub>2</sub> - uridine                | 57            |

Negative ion mode

| <b>ISTD</b>                                 | <b>CV (%)</b> |
|---------------------------------------------|---------------|
| 1,3- <sup>15</sup> N - uracil               | 17            |
| <sup>13</sup> C - Thymidine                 | 18            |
| 5 - bromotryptophan                         | 19            |
| D <sub>4</sub> - glycochenodeoxycholic acid | 21            |
| 3,3 - dimethylglutaric acid                 | 25            |
| D <sub>4</sub> - tyrosine                   | 27            |
| D <sub>5</sub> - phenylalanine              | 35            |

| <b>ESTD</b>                         | <b>CV (%)</b> |
|-------------------------------------|---------------|
| D <sub>2</sub> - uridine            | 29            |
| D <sub>3</sub> - methylmalonic acid | 55            |

Figure S5: Peak area variation of all metabolites identified in the QC sample

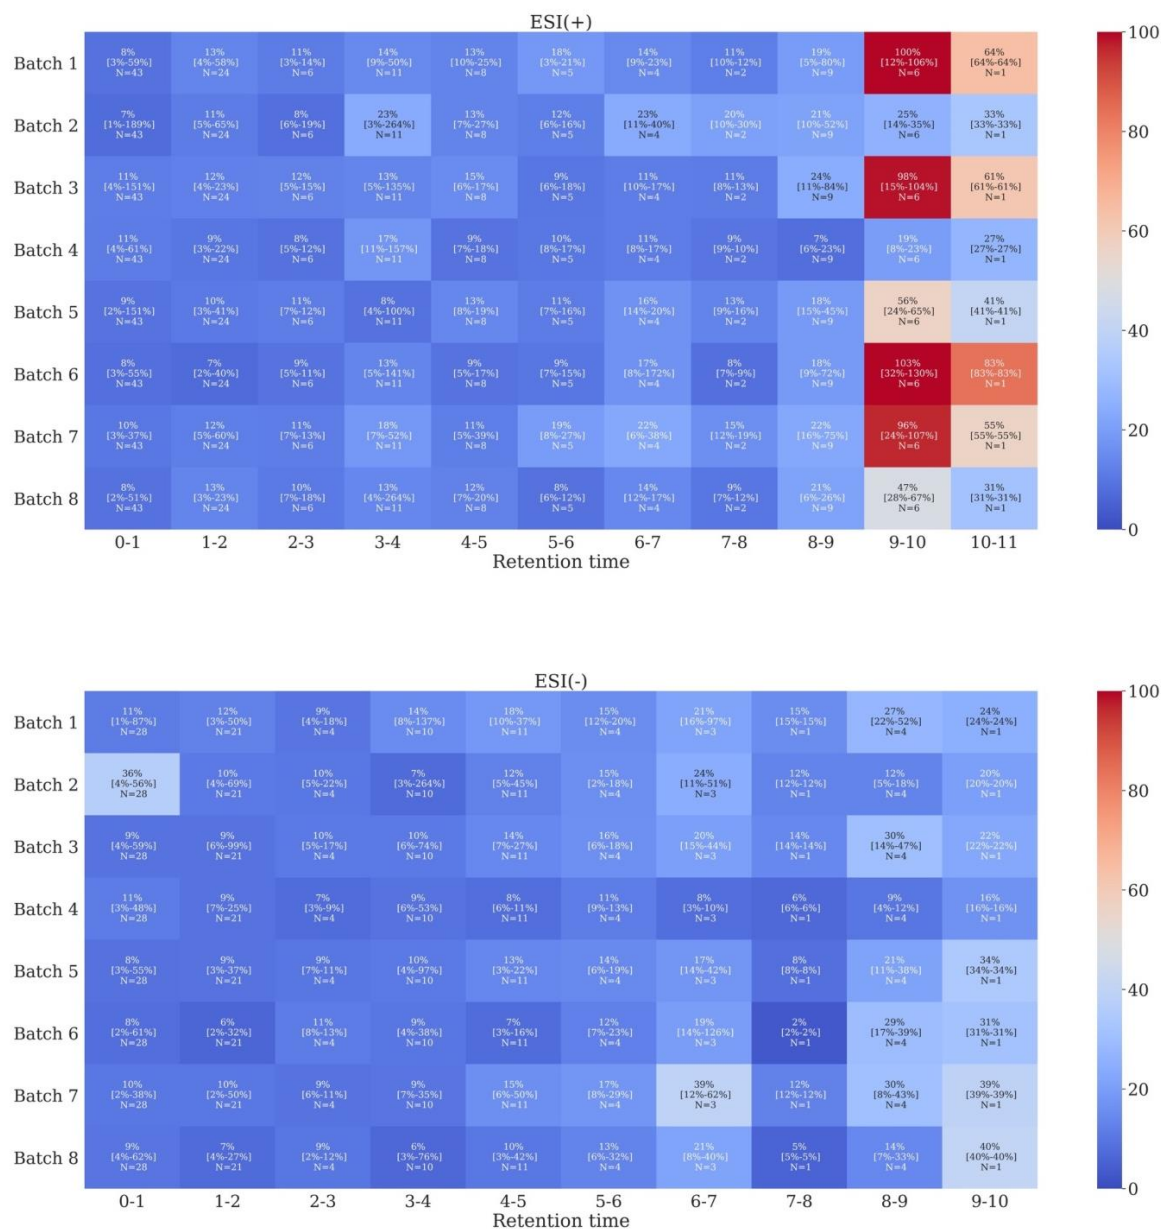

Heat maps showing variation in peak area during a chromatographic run. Panel A: positive ion mode. panel B: negative ion mode. A one-minute bin includes all metabolites eluting within this bin. For every bin the median CV in peak area, range of CV values and number of metabolites is indicated. Colour coding indicates median CV.

Figure S6: Separation of the isomeric pairs isoleucine/leucine and betaine/valine

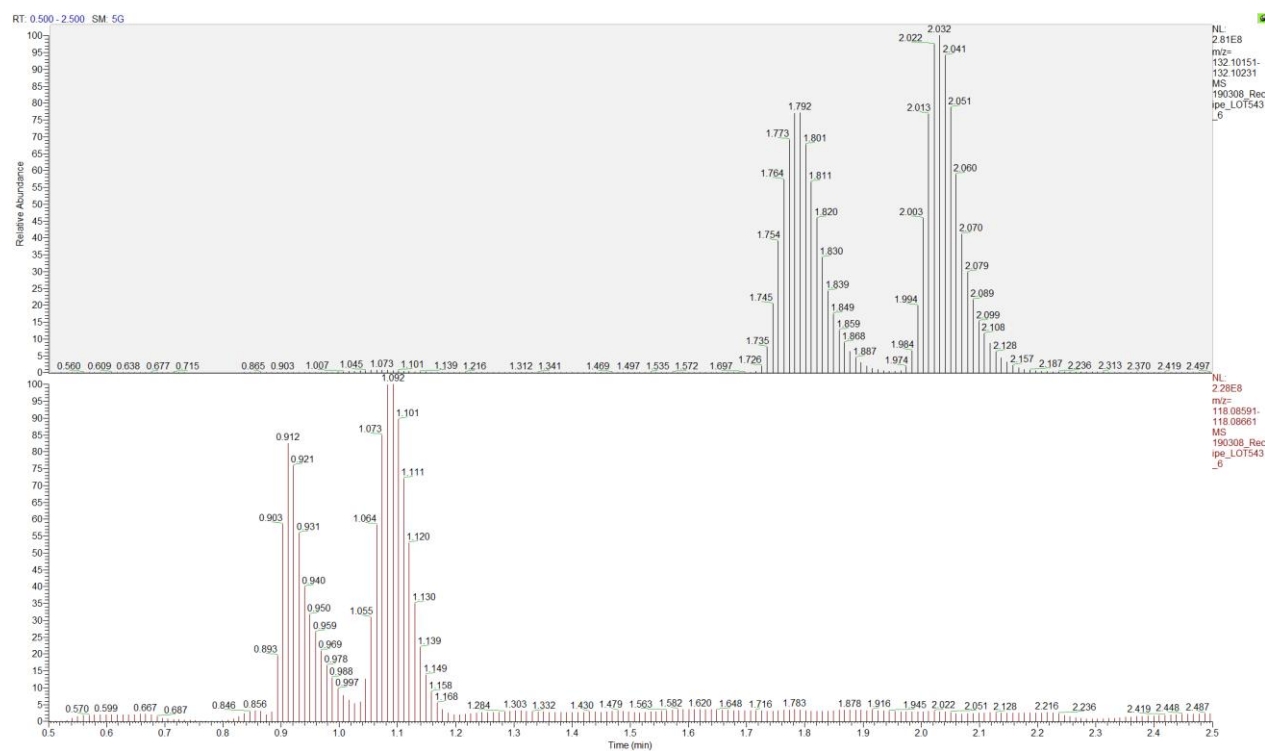

Top panel: XIC of isoleucine (RT: 1.79 min) and leucine (RT: 2.03 min). bottom panel: XIC of betaine (RT: 0.91 min) and valine (RT: 1.09 min)

Table S7: Progenesis QI settings

|                             |                                                                                                                               |
|-----------------------------|-------------------------------------------------------------------------------------------------------------------------------|
| Data import:                | Filter strength: 1                                                                                                            |
| Alignment reference:        | Automatic                                                                                                                     |
| Peak picking limits:        | Automatic sensitivity was set to 3.<br>Minimal peak width: 0.04 minutes                                                       |
| Retention time limits:      | Ignore ions before: 0.50 minutes.<br>Ignore ions after: 13.00 minutes                                                         |
| Considered adducts ESI (+): | [M+H], [M+Na], [M+K], [M-e], [M-NH <sub>3</sub> +H],<br>[M-H <sub>2</sub> O], [M+H+Na], [M+2H], [M+ACN+H], [2M+H],<br>[2M+Na] |
| Considered adducts ESI (-): | [M-H], [M+Na-2H], [M-H <sub>2</sub> O-H], [M-2H], [M-3H], [M+Cl],<br>[M+K- 2H], [M+FA-H], [2M+FA-H]                           |
